# Supplementary material for: Lysozyme-stabilized Ag nanoclusters: synthesis of different compositions and fluorescent responses to sulfide ions with distinct modes
Source: Royal Society of Chemistry journal article supplement (doi:10.1039/c6ra07827c), 2016-01-01
Supplement: c6ra07827c1.pdf [file c6ra07827c1.pdf]

# Lysozyme-stabilized Ag nanoclusters: synthesis to different composition and fluorescent responses to sulfide ion with distinct mode

Zhidan Gao<sup>a</sup>, Fang Liu<sup>a</sup>, Ruoxin Hu<sup>a</sup>, Meiping Zhao<sup>b</sup>, Na Shao<sup>\*a</sup>

<sup>a</sup>College of Chemistry, Beijing Normal University, Beijing 100875, PR China

<sup>b</sup>Beijing National Laboratory for Molecular Sciences, College of Chemistry and Molecular Engineering, Peking University, Beijing 100871, PR China

\*<sup>a</sup>E-mail: shaona@bnu.edu.cn . Fax: +86-10-58802146 .

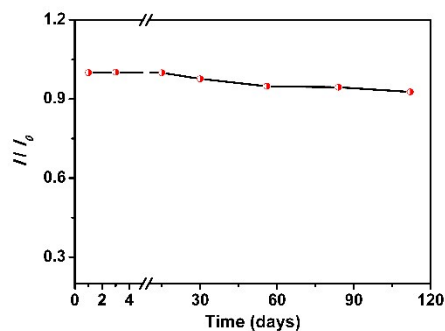

Fig. S1. Time stability of the as-prepared dLys-AgNCs **1**. ( $I_0$  was the photoluminescence intensity of dLys-AgNCs **1** at 640 nm in the first day, and  $I$  was the photoluminescence intensity of dLys-AgNCs **1** at 640 nm in the days after. The excitation wavelength was 490 nm.)

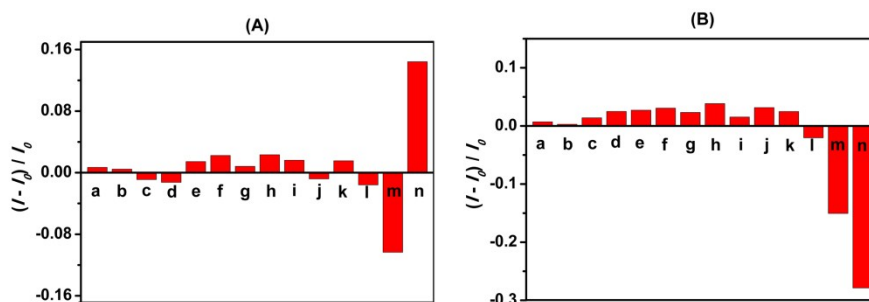

Fig. S2. Responses of dLys-AgNCs **2** to different anions of 5  $\mu\text{mol/L}$  (A) and 15  $\mu\text{mol/L}$  (B) (a:  $\text{NO}_3^-$ , b:  $\text{NO}_2^-$ , c:  $\text{PO}_4^{3-}$ , d:  $\text{HPO}_4^{2-}$ , e:  $\text{H}_2\text{PO}_4^-$ , f:  $\text{CO}_3^{2-}$ , g:  $\text{HCO}_3^-$ , h:  $\text{SO}_4^{2-}$ , i:  $\text{SO}_3^{2-}$ , j:  $\text{F}^-$ , k:  $\text{Cl}^-$ , l:  $\text{Br}^-$ , m:  $\text{I}^-$ , n:  $\text{S}^{2-}$ ).  $I_0$  and  $I$  were the photoluminescence intensity of dLys-AgNCs at 640 nm in the absence and presence of anions, respectively. The excitation wavelength was 490 nm.

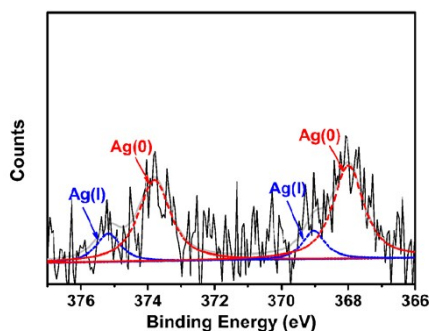

Fig. S3. XPS results of Ag 3d of the as-prepared dLys-AgNCs **1** in the presence of  $\text{S}^{2-}$ . The original spectra are in black, the Ag (I) 3d spectra are in blue and the Ag (0) 3d spectra are in red.

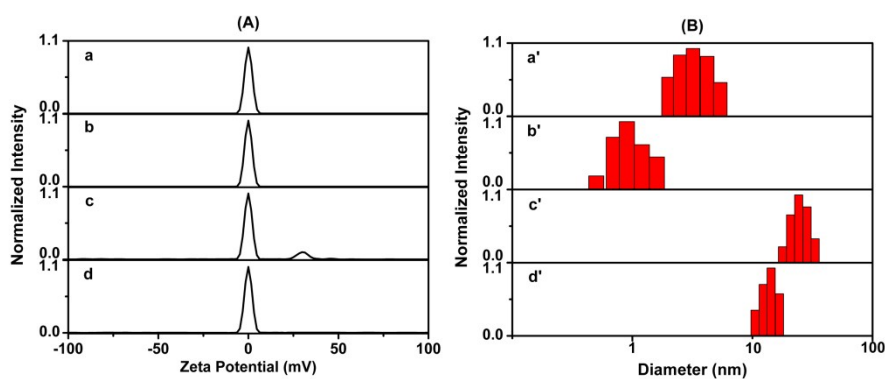

Fig. S4. Zeta potential (A) and DLS measurement (B) of dLys-AgNCs **1** and dLys-AgNCs **3** in the absence and presence of I<sup>-</sup> (a and a': dLys-AgNCs **1**, b and b': dLys-AgNCs **1** + 10 μmol/L I<sup>-</sup>, c and c': dLys-AgNCs **3**, d and d': dLys-AgNCs **3** + 10 μmol/L I<sup>-</sup>).

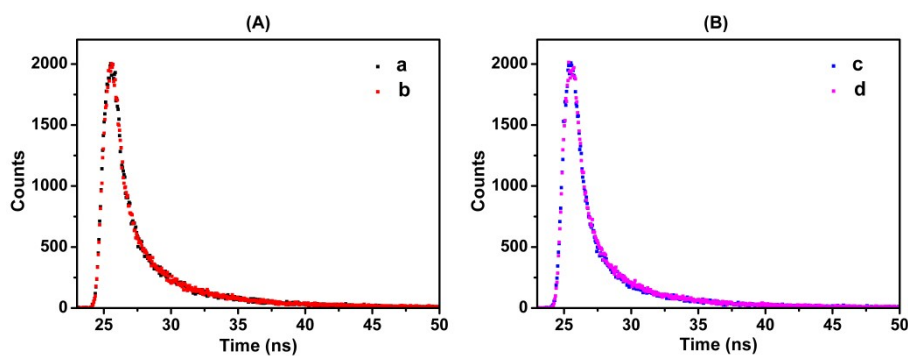

Fig. S5. Lifetime spectra of dLys-AgNCs **1** (A) and dLys-AgNCs **3** (B) in the absence and presence of S<sup>2-</sup> (a: dLys-AgNCs **1**, b: dLys-AgNCs **1** + 10 μmol/L S<sup>2-</sup>, c: dLys-AgNCs **3**, d: dLys-AgNCs **3** + 10 μmol/L S<sup>2-</sup>).

Table S1. Lifetime of dLys-AgNCs **1** and dLys-AgNCs **3** in the absence and presence of I<sup>-</sup>.

|                                                | $\tau_1$ (ns) | $\tau_2$ (ns) | $\tau_3$ (ns) |
|------------------------------------------------|---------------|---------------|---------------|
| dLys-AgNCs <b>1</b>                            | 1.81          | 0.34          | 6.40          |
| dLys-AgNCs <b>1</b> + 10 μmol/L I <sup>-</sup> | 1.29          | 0.27          | 4.34          |
| dLys-AgNCs <b>3</b>                            | 1.43          | 0.28          | 5.26          |
| dLys-AgNCs <b>3</b> + 10 μmol/L I <sup>-</sup> | 1.42          | 0.26          | 4.93          |
